# Supplementary material for: Large-scale ratcheting in a bacterial DEAH/RHA-type RNA helicase that modulates antibiotics susceptibility
Source: PubMed Central journal article supplement — Proc Natl Acad Sci U S A. 2021 Jul 21;118(30):e2100370118. doi: 10.1073/pnas.2100370118 (PMC8325345; doi:10.1073/pnas.2100370118), 2021-07-21
Supplement: pnas.2100370118.sapp.pdf [file pnas.2100370118.sapp.pdf]

**Supplementary Information for**  
Large-scale ratcheting in a bacterial DEAH/RHA-type RNA helicase  
that modulates antibiotics susceptibility

Lena M. Grass, Jan Wollenhaupt, Tatjana Barthel, Iwan Parfentev, Henning Urlaub, Bernhard Loll, Eberhard Klauck, Haike Antelmann, Markus C. Wahl

Correspondence to: Markus C. Wahl  
Email: [markus.wahl@fu-berlin.de](mailto:markus.wahl@fu-berlin.de)

**This PDF file includes:**

- Figures S1 to S3
- Tables S1 to S4
- Legends for Movies S1 and S2
- Legend for Dataset S1
- SI References

**Other supplementary materials for this manuscript include the following:**

- Movies S1 and S2
- Dataset S1

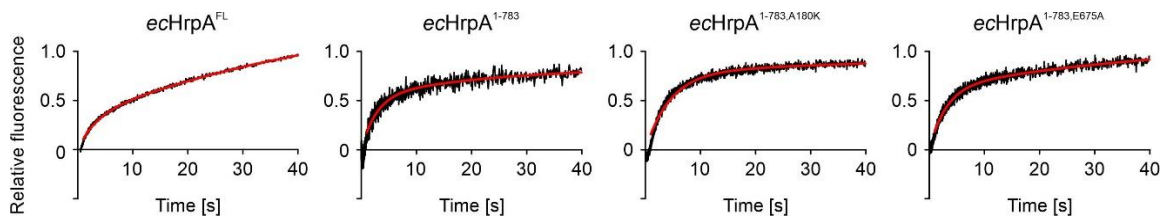

**Fig. S1.** Fitting of stopped-flow/fluorescence data. The data were fitted to a double exponential equation (fraction unwound =  $A_{fast}(1-\exp(-k_{fast}t)) + A_{slow}(1-\exp(-k_{slow}t))$ ;  $A$ , total unwinding amplitude;  $k$ , unwinding rate constants [ $s^{-1}$ ];  $t$ , time [s]), as described (1, 2). The first second of data acquisition was excluded from curve fitting to account for the initial mixing periods. Amplitude-weighted unwinding rate constants were calculated as  $k_{unw} = \frac{\sum(A_i k_i^2)}{\sum(k_i A_i)}$ . Curve fitting yielded data shown in Fig. 2D and Fig. 2H and listed in SI Appendix, Table S2.

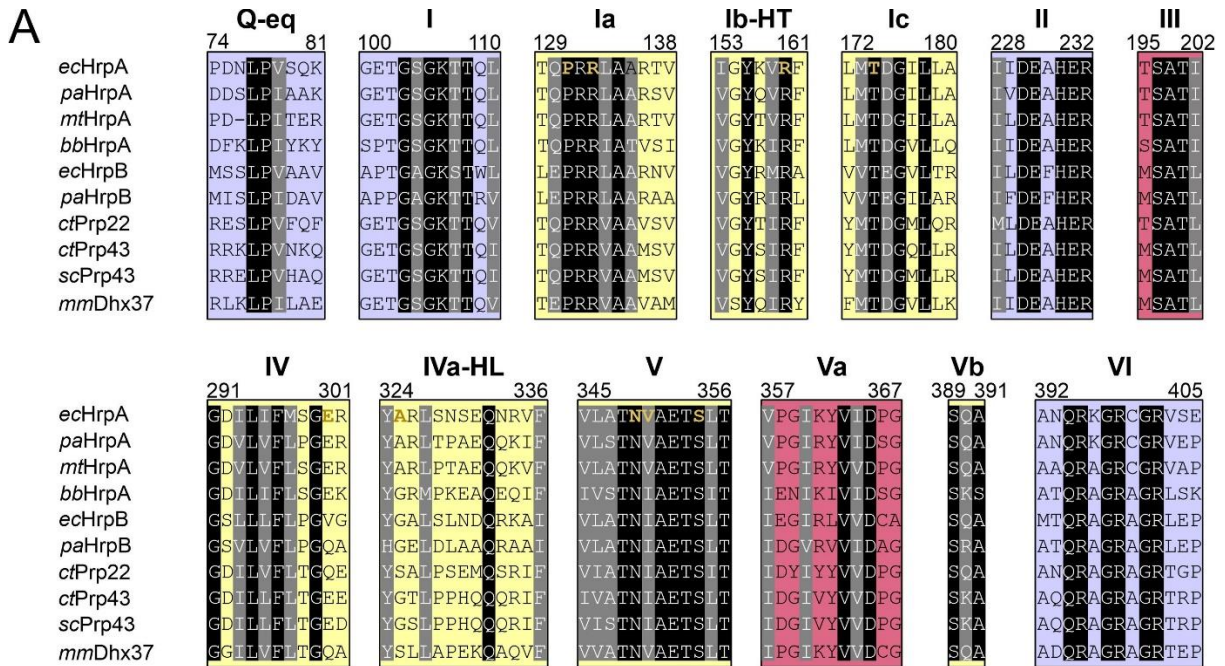

**B** NTP binding/hydrolysis

RNA binding

Communication between  
NTP and RNA-binding sites

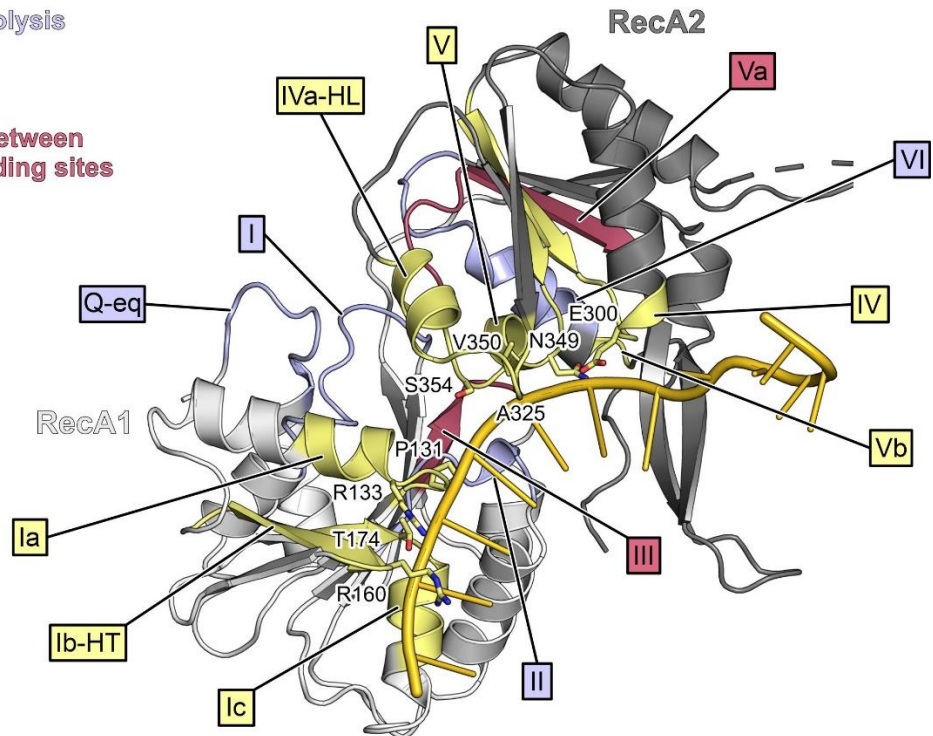

**Fig. S2.** Conserved helicase motifs. (A) Multiple sequence alignment of helicase core motifs (indicated above the alignment) in bacterial and eukaryotic DEAH/RHA proteins. Q-eq, equivalent of the Q motif; HT, hook-turn; HL, hook-loop; *ec*, *E. coli*; *pa*, *Pseudomonas aeruginosa*; *mt*, *Mycobacterium tuberculosis*; *bb*, *Borrelia burgdorferi*; *ct*, *Chaetomium thermophilum*; *sc*, *Saccharomyces cerevisiae*; *mm*, *Mus musculus*. Invariant residues, black background; highly conserved residues, gray background; RNA-interacting residues of ecHrpA<sup>1-783</sup>, gold. Residue numbering above the alignment refers to ecHrpA. The background colors of the motif boxes

indicate the involvement of the respective motif in NTP binding/hydrolysis (blue), communication between NTP and RNA-binding sites (red) or RNA binding (yellow). (*B*) Cartoon plot of the RecA-like domains and bound RNA of the *echHrpA*<sup>1-783</sup>-U<sub>15</sub> crystal structure. Residues shown as sticks and labeled, RNA-interacting residues of *echHrpA*<sup>1-783</sup> (highlighted in gold in the multiple sequence alignment).

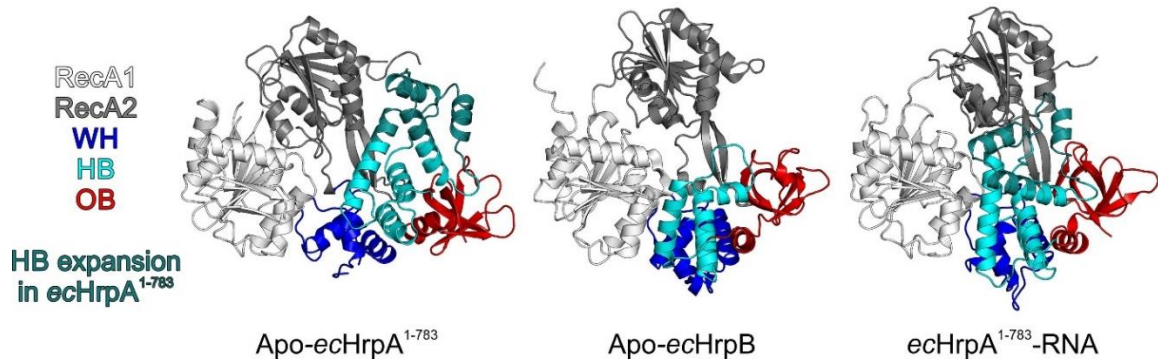

**Fig. S3.** Comparison of the conformations of the DEAH/RHA-like helicase cassettes in apo-ecHrpA<sup>1-783</sup> (left), apo-ecHrpB (middle) and RNA-bound ecHrpA<sup>1-783</sup> (right). The apo-ecHrpB conformation resembles that of RNA-bound ecHrpA<sup>1-783</sup>. Expansion elements of the ecHrpA<sup>1-783</sup> HB domain, teal.

**Table S1.** Oligonucleotides employed<sup>(a)</sup>

| Oligonucleotide                                                                                   | Source               |
|---------------------------------------------------------------------------------------------------|----------------------|
| <b>Primers for construction of <i>hrpA::kan</i> mutant</b>                                        |                      |
| HrpA-up: 5'-TAATACCTTGCTCATGGTGTTC-3'                                                             | Microsynth<br>Seqlab |
| HrpA-down: 5'-GTGAGATAATAGTGAGAAGCGG-3'                                                           |                      |
| ctrl-K1: 5'-CAGTCATAGCCGAATAGCCT-3'                                                               |                      |
| ctrl-K2: 5'-CGGTGCCCTGAATGAACTGC-3'                                                               |                      |
| <b>Primers for cloning into pBAD LIC (8A) vector</b>                                              |                      |
| pBAD_fw: 5'-AGGATCCCTTGCTGTTTTG-3'                                                                | Microsynth<br>Seqlab |
| pBAD_rv: 5'-GGGATATCTATA TCTCCTTCTTAAAGTTAAAC-3'                                                  |                      |
| ecHrpA_pBAD_fw:<br>5'-TGATTATAAAGACGATGATGACAAGATGACAGAACAACAAAAATTGACCTTTACG-3'                  |                      |
| ecHrpA_pBAD_rv:<br>5'-TCCGCCAAAACAGCCAAGGGATCCTTTAACCGCTAATCTGCTCCATCG-3'                         |                      |
| tag_fw:<br>5'-TTAAGAAGGAGATATAGATATCCCATGAACCA CCATCA CCA CCA CCATGCAGGAAAAGC-3'                  |                      |
| tag_rv:<br>5'-AGGTCAATTTTTGTTGTTCTGTGTCATCTTGTGTCATCATCGTCTTTATAATCAATA TCATGGTCCTTA<br>TAATCG-3' |                      |
| <b>Primers for cloning into pETM-11 vector</b>                                                    |                      |
| ecHrpA_fw: 5'-TCTTTATTTTCAGGGCGCCA TGGCGA TGA CAGAACAACAAAAATTGACCTTTAC-3'                        | Eurofins<br>Genomics |
| ecHrpA_rv: 5'-TGTCGACGGA GCTCGAATTCGGTTAACCGCTAATCTGCTCCATCG-3'                                   |                      |
| ecHrpA(1-783)_fw: 5'-GCGGCCGCACTCG-3'                                                             |                      |
| ecHrpA(1-783)_rv: 5'-TTATGATTTGTGTTCCAGCTCTTCTACTTCC-3'                                           |                      |
| ecHrpA(784-1300)_fw: 5'-CGTCGCCGCGATA TTCTG-3'                                                    |                      |
| ecHrpA(784-1300)_rv: 5'-GCCCTGAAAATAAAGATTCTCAGTAGTGG-3'                                          |                      |
| ecHrpA(909-1300)_fw: 5'-TCGTTGCCGAAACCGGTA-3'                                                     |                      |
| ecHrpA(909-1300)_rv: 5'-GCCCTGAAAATAAAGATTCTCAGTAGTGG-3'                                          |                      |
| <b>Primers for introducing point mutations <i>via</i> inverse PCR</b>                             |                      |
| ecHrpA_K106A_fw: 5'-CAACGACTCAGTTACGAAAATCTGTATGG-3'                                              | Eurofins<br>Genomics |
| ecHrpA_K106A_rv: 5'-CACCAAGACCCGTTTCCCGG-3'                                                       |                      |
| ecHrpA(1-783)_D305A_fw: 5'-CCGATGCGCTGAACAAGCTG-3'                                                |                      |
| ecHrpA(1-783)_D305A_rv: 5'-CGGTAGCGCGGATTTCCCG-3'                                                 |                      |
| ecHrpA(1-783)_E675A_fw: 5'-CAACCAGCCGCTGTGGGG-3'                                                  |                      |
| ecHrpA(1-783)_E675A_rv: 5'-CTACCAGTTCCGCCACCATTACC-3'                                             |                      |
| ecHrpA(1-783)_A180K_fw: 5'-AGAGATCCAGCAAGACCGCC-3'                                                |                      |
| ecHrpA(1-783)_A180K_rv: 5'-TTCAGCAGGATA CCGTCGGTC-3'                                              |                      |
| ecHrpA(1-783)_FP_fw: 5'-GCCGTTCTGGTTTATTCAAAAA-3'                                                 |                      |
| ecHrpA(1-783)_FP_rv: 5'-GGCGATGGAGAAACGCGGTTAC-3'                                                 |                      |
| <b>Oligonucleotide for RNA binding assays</b>                                                     |                      |
| FAM-RNASS15: [5-FAM]-5'-GCUGCCA GACCAAAU-3'                                                       | IBA                  |
| FAM-RNABlunt:<br>5'-GCUGCCAGACCAAAU-3'-[5-FAM]<br>5'-AUUUGGUCUGGCAGC-3'                           |                      |
| FAM-RNA3'ovh:<br>5'-GACCAGCACGCG-3'<br>5'-CGCGUGCUGGUCUAAACCAGACCGUCG-3'-[5-FAM]                  |                      |
|                                                                                                   |                      |

|                                                                                                                                 |                   |
|---------------------------------------------------------------------------------------------------------------------------------|-------------------|
| FAM-RNA5'ovh:<br>5'- <b>GCGCACGACCAG</b> -3'<br>[5-FAM]-5'-GCUGCCA GACCAAAUC <b>UGGUCGUGCGC</b> -3'                             |                   |
| FAM-RNAFork:<br>5'- <b>GCGCACGACCAG</b> GAAAUUUAAUUA UAA-3'-[5-FAM]<br>5'-GCUGCCA GACCAAAUC <b>UGGUCGUGCGC</b> -3'              |                   |
| FAM-DNASS16: [5-FAM]-5'-TATAAACCAGACCGTC-3'                                                                                     |                   |
| <b>Oligonucleotides for unwinding assays</b>                                                                                    |                   |
| RNA 3'ovh:<br>[Atto540Q]-5'-GGCCGCGA GCCGAAAUUUAAUUUAAACCAGA CCGUCUCCUC-3'<br>5'- <b>CGGCUCGCGGCC</b> -3'-[Alexa488]            | IBA               |
| RNA 5'ovh:<br>5'-CUCCUCUGCCA GACCAAAUA UUAAUUUAAAG <b>GCCGAGCGCCGG</b> -3'-[Atto540Q]<br>[Alexa488]-5'- <b>CCGGCGCUCGGC</b> -3' |                   |
| DNA_3'ovh:<br>[Atto540Q]-5'- <b>GGCCGCGAGCG</b> GAAATTTAATTATAAACCAGACCGTCTCCTC-3'<br>5'- <b>CGGCTCGCGGCC</b> -3'-[Alexa488]    |                   |
| <b>Oligonucleotides for crystallization and ATPase assay</b>                                                                    |                   |
| RNA_U_15: 5'-UUUUUUUUUUUUUUUU-3'                                                                                                | IBA               |
| DNA_19nts: 5'-GCGTCCCAGTCCGGCATCT-3'                                                                                            | Eurofins Genomics |

<sup>a</sup> Complementary regions in bold

**Table S2.** Helicase parameters quantified based on data shown in Fig. 2D and Fig. 2H

| <b>ecHrpA variant</b>         | <b>ecHrpA<sup>FL</sup></b> | <b>ecHrpA<sup>1-783</sup></b> | <b>ecHrpA<sup>1-783,A180K</sup></b> | <b>ecHrpA<sup>1-783,E675A</sup></b> |
|-------------------------------|----------------------------|-------------------------------|-------------------------------------|-------------------------------------|
| $k_{fast}$ [s <sup>-1</sup> ] | 0.32                       | 0.36                          | 0.26                                | 0.33                                |
| $k_{slow}$ [s <sup>-1</sup> ] | 0.02                       | 0.04                          | 0.02                                | 0.02                                |
| $A_{fast}$                    | 0.31                       | 0.53                          | 0.72                                | 0.62                                |
| $A_{slow}$                    | 1.21                       | 0.31                          | 0.28                                | 0.52                                |
| R <sup>2</sup>                | 0.9417                     | 0.7039                        | 0.9141                              | 0.9503                              |
| Absolute sum of squares       | 20.29                      | 68.80                         | 11.44                               | 7.72                                |
| $k_{unw}$ [s <sup>-1</sup> ]  | 0.26                       | 0.34                          | 0.25                                | 0.31                                |
| Fold-FL ( $k_{unw}$ )         | 1.00                       | 1.30                          | 0.96                                | 1.18                                |



**Table S3.** Crystallographic data<sup>(a)</sup>

| Dataset                                                                                                                                            | HrpA <sup>1-783, SeMet</sup>                      | HrpA <sup>1-783,U305A</sup>                      | HrpA <sup>1-783,SeMet</sup>                      | HrpA <sup>1-783-U15</sup>                         |
|----------------------------------------------------------------------------------------------------------------------------------------------------|---------------------------------------------------|--------------------------------------------------|--------------------------------------------------|---------------------------------------------------|
| PDB entry                                                                                                                                          | 6ZWX                                              | 7AKP                                             | -                                                | 6ZWW                                              |
| <b>Data collection</b>                                                                                                                             |                                                   |                                                  |                                                  |                                                   |
| Wavelength [Å]                                                                                                                                     | 0.9184                                            | 0.9184                                           | 0.980                                            | 0.9184                                            |
| Temperature [K]                                                                                                                                    | 100                                               | 100                                              | 100                                              | 100                                               |
| Space group                                                                                                                                        | P2 <sub>1</sub>                                   | P2 <sub>1</sub>                                  | P2 <sub>1</sub>                                  | C2                                                |
| Unit cell parameters<br>a, b, c [Å]<br>α, β, γ [°]                                                                                                 | 40.1, 116.5, 92.6<br>90.0, 98.6, 90.0             | 39.9, 114.9, 94.6<br>90.0, 102.0, 90.0           | 40.0, 117.0, 94.5<br>90.0, 99.6, 90.0            | 220.8, 126.2, 179.2<br>90.0, 110.8, 90.0          |
| Resolution [Å]                                                                                                                                     | 50.00 - 2.70<br>(2.85 - 2.70)                     | 50.00 - 2.59<br>(2.75 - 2.59)                    | 50.00 - 3.00<br>(3.18 - 3.00)                    | 50.00 - 3.19<br>(3.34 - 3.15)                     |
| Reflections<br>Unique<br>Completeness [%]<br>Multiplicity                                                                                          | 23,139 (3,427)<br>99.9 (99.4)<br>12.9 (8.7)       | 25,697 (4,048)<br>99.2 (97.0)<br>6.9 (6.8)       | 50,272 (3,581)<br>99.6 (95.3)<br>28.4 (27.8)     | 78,441 (12,390)<br>99.0 (97.5)<br>5.0 (4.8)       |
| Data quality<br>Intensity [I/σ(I)]<br>R <sub>meas</sub> [%] <sup>(b)</sup><br>CC <sub>1/2</sub> <sup>(c)</sup><br>Wilson B value [Å <sup>2</sup> ] | 12.9 (0.8)<br>12.1 (219.3)<br>99.3 (41.1)<br>87.3 | 7.3 (0.8)<br>30.1 (266.6)<br>98.7 (33.3)<br>56.6 | 9.3 (0.8)<br>45.6 (380.9)<br>99.5 (35.6)<br>89.8 | 8.9 (0.5)<br>14.6 (320.5)<br>99.8 (22.4)<br>105.8 |
| <b>Phasing</b>                                                                                                                                     |                                                   |                                                  |                                                  |                                                   |
| Number of Se atoms                                                                                                                                 |                                                   |                                                  | 16                                               |                                                   |
| Figure of merit                                                                                                                                    |                                                   |                                                  | 0.558                                            |                                                   |
| <b>Refinement</b>                                                                                                                                  |                                                   |                                                  |                                                  |                                                   |
| Resolution [Å]                                                                                                                                     | 50.00 - 2.70<br>(2.82 - 2.70)                     | 50.00 - 2.60<br>(2.70 - 2.59)                    |                                                  | 49.40 - 3.16<br>(3.27 - 3.16)                     |
| Reflections<br>Number<br>Test set [%]                                                                                                              | 23,311<br>5.0                                     | 25,695<br>5.0                                    |                                                  | 78,400<br>2.7                                     |
| R <sub>work</sub> [%]<br>R <sub>free</sub> [%]                                                                                                     | 22.4 (36.9)<br>27.6 (39.5)                        | 21.1 (36.9)<br>31.2 (32.4)                       |                                                  | 22.3 (52.9)<br>26.3 (51.2)                        |
| Asymmetric unit<br>Non-hydrogen atoms<br>Protein residues<br>RNA nucleotides<br>Water molecules                                                    | 5,912<br>736<br>-<br>11                           | 5,800<br>723<br>-<br>-                           |                                                  | 24,593<br>2,959<br>44<br>-                        |
| Mean temperature factors [Å <sup>2</sup> ]<br>All atoms<br>Protein<br>RNA<br>Water                                                                 | 102.3<br>102.3<br>-<br>92.1                       | 70.5<br>70.5<br>-<br>-                           |                                                  | 144.8<br>127.7<br>145.1<br>-                      |
| RMSD <sup>(d)</sup> from target geometry<br>Bond lengths [Å]<br>Bond angles [°]                                                                    | 0.004<br>0.617                                    | 0.003<br>0.615                                   |                                                  | 0.004<br>0.781                                    |
| <b>Validation</b>                                                                                                                                  |                                                   |                                                  |                                                  |                                                   |
| Ramachandran plot <sup>(e)</sup><br>Favored [%]<br>Disallowed [%]                                                                                  | 96.6<br>0.3                                       | 96.2<br>0.7                                      |                                                  | 96.3<br>0.2                                       |
| Ramachandran Z-score <sup>(e)</sup><br>All<br>Helices<br>Sheets<br>Loops                                                                           | -1.79<br>-1.59<br>-0.95<br>-0.51                  | -3.23<br>-2.59<br>-1.34<br>-1.67                 |                                                  | -1.78<br>-1.42<br>-0.31<br>-1.04                  |
| MOLPROBITY scores <sup>(f)</sup><br>Clashscore <sup>(g)</sup><br>Score                                                                             | 6.55<br>1.98                                      | 9.40<br>2.29                                     |                                                  | 11.69<br>1.83                                     |

- a Data for the highest resolution shells in parentheses
- b  $R_{\text{meas}}(I) = \sum_h [N/(N-1)]^{1/2} \sum_i |I_{ih} - \langle I_h \rangle| / \sum_h \sum_i I_{ih}$ , in which  $\langle I_h \rangle$  is the mean intensity of symmetry-equivalent reflections  $h$ ,  $I_{ih}$  is the intensity of a particular observation of  $h$  and  $N$  is the number of redundant observations of reflection  $h$  (3)
- c  $CC_{1/2} = (\sigma_{\tau}^2) / (\sigma_{\tau}^2 + \sigma_{\epsilon}^2)$ , in which  $\sigma_{\tau}^2$  is the variance of  $\tau$ ,  $\sigma_{\epsilon}^2$  is the variance of  $\epsilon_{A,B}$ ,  $\tau$  is the difference between true values of intensities and their average,  $\epsilon_{A,B}$  are the random errors in merged intensities of half-sized subsets (4)
- d RMSD, root mean square deviation
- e Calculated with PHENIX (5)
- f Calculated with MOLPROBITY (6)
- g Clashscore is the number of serious steric overlaps ( $> 0.4$ ) per 1,000 atoms (6)

**Table S4.** Cross-links between residues on domains that undergo conformational rearrangements<sup>(a)</sup>

| Cross-linked residues | Log2 ratio apo/RNA | C $\alpha$ -C $\alpha$ distance apo-ecHrpA <sup>1-783</sup> [Å] | C $\alpha$ -C $\alpha$ distance ecHrpA <sup>1-783</sup> -U <sub>15</sub> [Å] |
|-----------------------|--------------------|-----------------------------------------------------------------|------------------------------------------------------------------------------|
| K106-K361             | 0.58               | 22.0                                                            | 24.9                                                                         |
| K312-K570             | 1.02               | 18.4                                                            | 45.8                                                                         |
| K485-K721             | 0.50               | 30.9                                                            | 33.3                                                                         |
| K312-K537             | -0.89              | 32.2                                                            | 19.1                                                                         |
| K312-K544             | -1.06              | 30.8                                                            | 29.6                                                                         |
| K312-K662             | -0.76              | 48.8                                                            | 33.4                                                                         |

<sup>a</sup> Green entries, more abundant in apo-ecHrpA<sup>1-783</sup>; orange entries, more abundant in ecHrpA<sup>1-783</sup>-U<sub>15</sub>

**Movie S1 (separate file).** Movie S1 shows a morph between apo and RNA-bound conformations of eHrpA<sup>1-783</sup> viewed in two orientations. For this and the following movie, coordinates were morphed with PyMOL (Schrödinger Inc.; <https://pymol.org/2>). The movies were compiled with Shotcut (<https://www.shotcut.org>).

**Movie S2 (separate file).** Movie S2 shows comparative morphs between apo and RNA-bound conformations in eHrpA<sup>1-783</sup> and *C. thermophilum* Prp22 (PDB IDs 6I3O and 6I3P).

**Dataset S1 (separate file).** Results from quantitative cross-linking mass spectrometry using isotopic labels. Sheet 'All' contains all identified and quantified unique cross-linked residues, sheet 'Rearranged domains' contains cross-links between residues on domains that undergo conformational rearrangements (see also SI Appendix, Table S4).

## SI References

1. A. R. Ozes, K. Feoktistova, B. C. Avanzino, E. P. Baldwin, C. S. Fraser, Real-time fluorescence assays to monitor duplex unwinding and ATPase activities of helicases. *Nat. Protoc.* **9**, 1645-1661 (2014).
2. J. J. Roske, S. Liu, B. Loll, U. Neu, M. C. Wahl, A skipping rope translocation mechanism in a widespread family of DNA repair helicases. *Nucleic Acids Res.* **49**, 504-518 (2021).
3. K. Diederichs, P. A. Karplus, Improved R-factors for diffraction data analysis in macromolecular crystallography. *Nat. Struct. Biol.* **4**, 269-275 (1997).
4. P. A. Karplus, K. Diederichs, Linking crystallographic model and data quality. *Science* **336**, 1030-1033 (2012).
5. P. D. Adams *et al.*, PHENIX: a comprehensive Python-based system for macromolecular structure solution. *Acta Crystallogr. D Biol. Crystallogr.* **66**, 213-221 (2010).
6. C. J. Williams *et al.*, MolProbity: More and better reference data for improved all-atom structure validation. *Protein Sci.* **27**, 293-315 (2018).
